# Supplementary material for: Chemoenzymatic synthesis and pH-responsive properties of amphoteric block polysaccharides
Source: Royal Society of Chemistry journal article supplement (doi:10.1039/c6ob00817h), 2016-01-01
Supplement: c6ob00817h1.pdf [file c6ob00817h1.pdf]

## Supplementary Information

### **Chemoenzymatic Synthesis and pH-Responsive Properties of Amphoteric Block Polysaccharides**

*Takuya Nakauchida, Yusei Takata, Kazuya Yamamoto and Jun-ichi Kadokawa\**

Department of Chemistry, Biotechnology, and Chemical Engineering, Graduate School  
of Science and Engineering, Kagoshima University, 1-21-40 Korimoto, Kagoshima  
890-0065, Japan

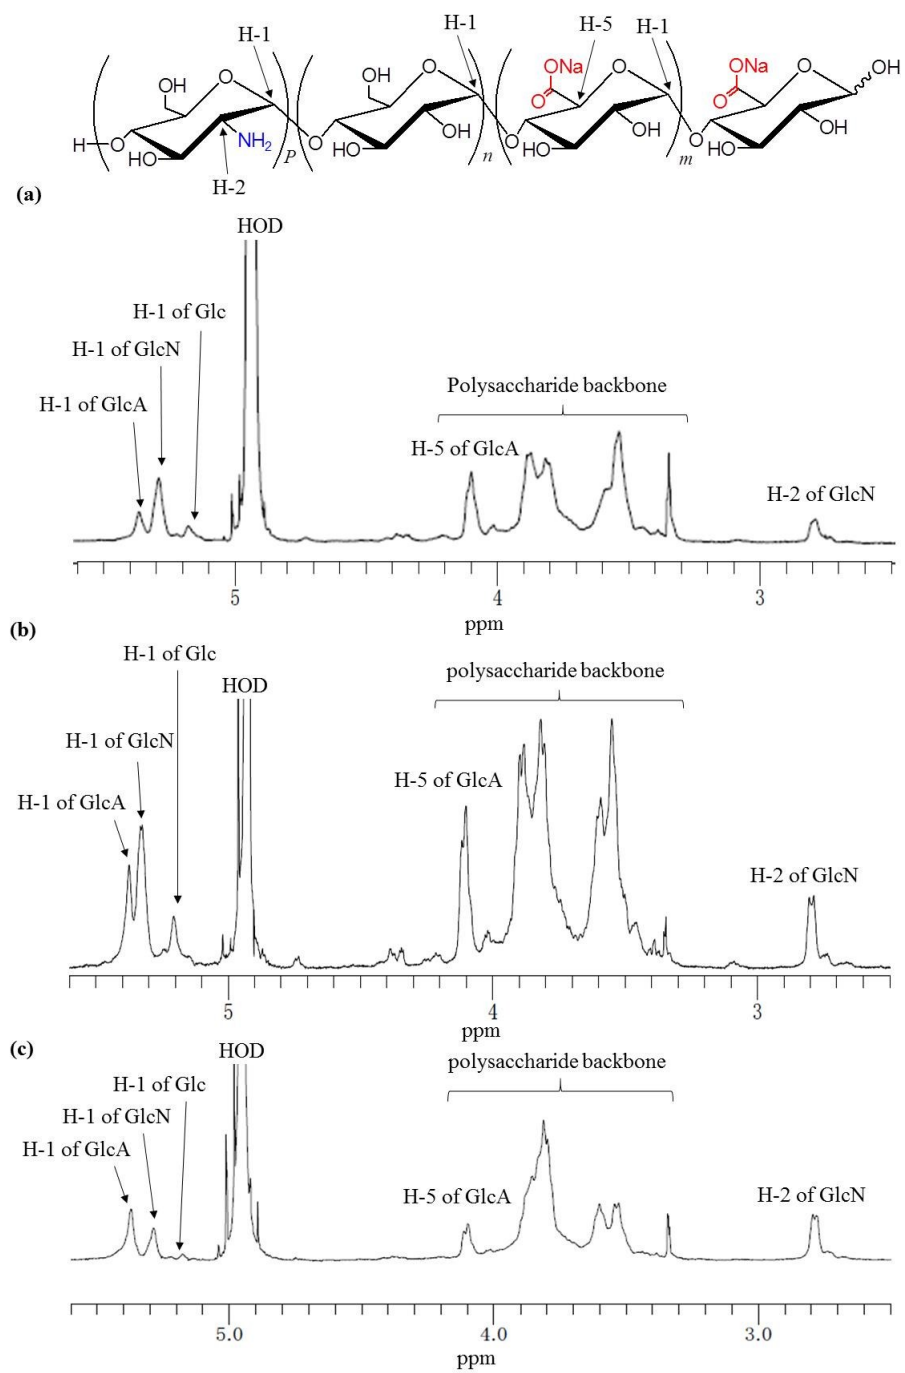

**Fig. S1.**  $^1\text{H}$  NMR spectra of amphoteric block polysaccharides ((a) run 1, (b) run 2, (c) run 3) in NaOD/D<sub>2</sub>O.

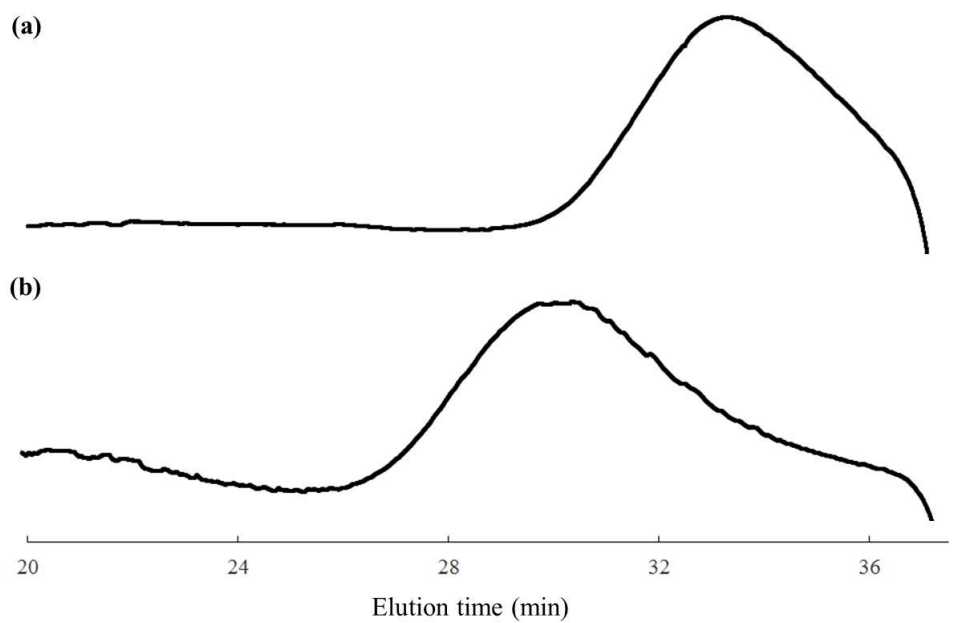

**Fig. S2.** GPC Profiles of (a) maltooligosaccharide-functionalized amylose and (b) amphoteric block polysaccharide (run 4).

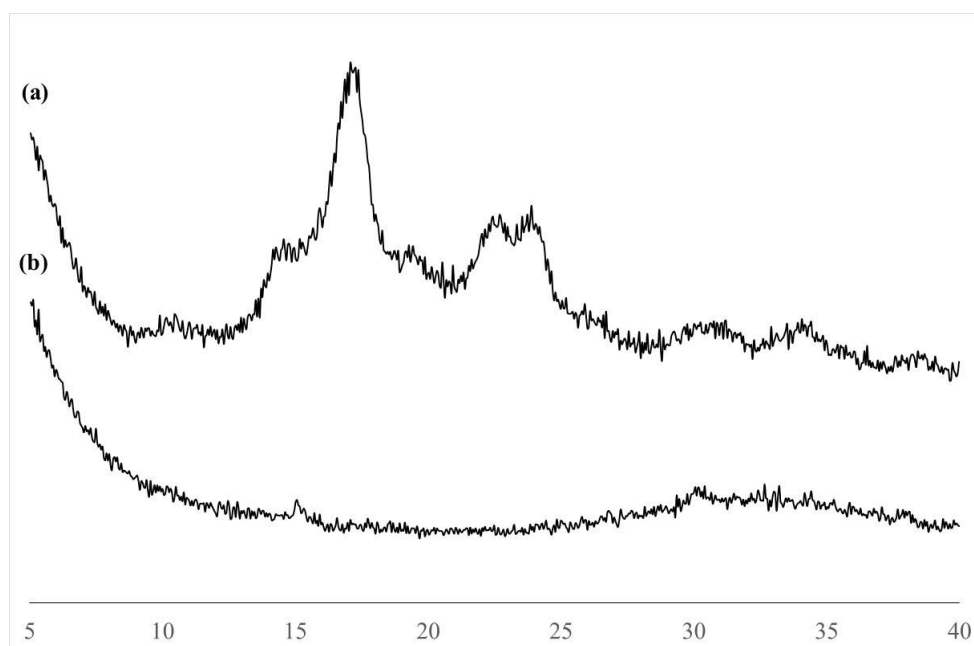

**Fig. S3.** XRD Profiles of (a) amylose and (b) amphoteric block polysaccharide (run 4).
